# Supplementary material for: Antioxidant and Immunostimulatory Activities of a Submerged Culture of Cordyceps sinensis Using Spent Coffee
Source: MDPI journal article supplement (doi:10.3390/foods10081697), 2021-07-22
Supplement: s1 [file s1]

## Supplementary materials

**Table S1.** Proximate composition of SCG

| Composition (%) | SCG                |                   |
|-----------------|--------------------|-------------------|
|                 | Before fat removal | After fat removal |
| Moisture        | 3.67 ± 0.10        | 4.06 ± 0.06       |
| Ash             | 1.46 ± 0.22        | 1.61 ± 0.14       |
| Protein         | 15.17 ± 0.17       | 16.77 ± 0.10      |
| Fat             | 17.62 ± 0.55       | 8.10 ± 0.25       |
| Carbohydrate    | 62.08 ± 2.82       | 68.61 ± 1.03      |

Values are means ± SD (n=3).

**Table S2.** Dietary fiber composition of SCG

| Dietary fiber | Content (g/100 g) |
|---------------|-------------------|
| Total         | 71.8 ± 1.6        |
| Soluble       | 1.7 ± 0.0         |
| Insoluble     | 70.1 ± 1.6        |

Values are means ± SD (n=3).

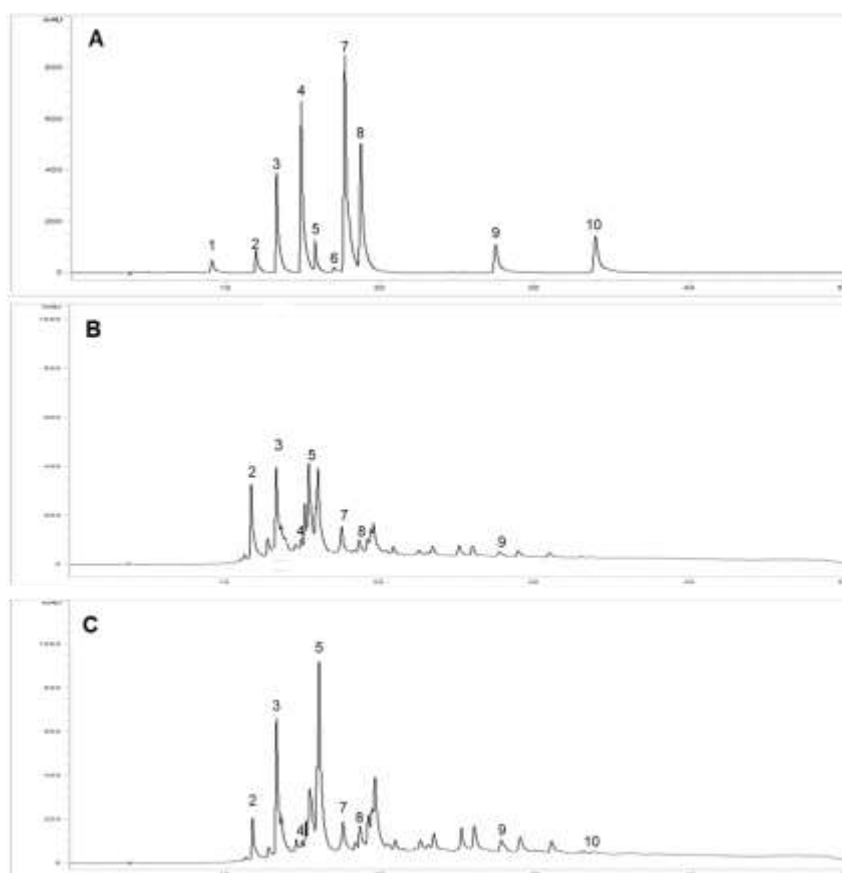

**Figure S1.** HPLC chromatogram of polyphenol compounds in control (B) and fermented SCG (C). 1: gallic acid, 2: 3,4-dihydrobenzoic acid, 3: chlorogenic acid, 4: caffeic acid, 5: p-coumaric acid, 6: ferulic acid, 7: rutin, 8: ellagic acid, 9: quercetin, 10: kaempferol
